# Supplementary material
Source: publisher figshare collection journal article supplement (https://gsapubs.figshare.com/articles/dataset/_/14637843)
Supplement: Supplementary file 1 [file 1]

Virolle, M., Brigaud, B., Beaufort, D., Patrier, P., Abdelrahman, E., Thomas, H., Portier, E., Samson, Y., Bourillot, R., and Féliès, H., 2021, Authigenic berthierine and incipient chloritization in shallowly buried sandstone reservoirs: Key role of the source-to-sink context: GSA Bulletin, <https://doi.org/10.1130/B35865.1>.

## Supplemental Material

**Table S1.** Sample description and petrographical/mineralogical composition (sample list, well location projection WGS84, sample depth, petrographical and clay mineral quantifications).
